# Supplementary material for: Biomechanics of the Human Osteochondral Unit: A Systematic Review
Source: MDPI journal article supplement (doi:10.3390/ma17071698), 2024-04-08
Supplement: s1 [file s1]

## List of Abbreviations

|                  |                                                                 |
|------------------|-----------------------------------------------------------------|
| aBV/TV           | Axial Bone Volume Fraction                                      |
| AC               | Articular Cartilage                                             |
| appBVF           | Apparent Bone Volume Fraction                                   |
| BMI              | Body-Mass Index                                                 |
| BS/TV            | Bone Surface/Total Volume                                       |
| BV/TV            | Bone Volume Fraction                                            |
| BWM              | Best-Worst Method                                               |
| C                | Compression                                                     |
| CC               | Confined Compression                                            |
| D                | Dynamic (constitutive model)                                    |
| DIC              | Digital Image Correlation                                       |
| DVC              | Digital Volume Correlation                                      |
| DXA              | Dual-Energy X-ray Absorption (also known as DEXA)               |
| E                | Elastic or Young Modulus                                        |
| E <sub>dyn</sub> | Dynamic Modulus                                                 |
| E <sub>f</sub>   | Initial or Strain-dependent Fibril Network Modulus              |
| E <sub>m</sub>   | Initial or Strain-dependent Non-Fibrillar Matrix Modulus        |
| E <sub>q</sub>   | Equilibrium Modulus                                             |
| E <sub>0</sub>   | Instantaneous Modulus or Strain-dependent Instantaneous Modulus |
| ECM              | Extra-Cellular Matrix                                           |
| EP               | Elasto Plastic (constitutive model)                             |
| FRPVE            | Fibril-Reinforced Poro-Visco-Elastic (constitutive model)       |
| GAG              | Glycosaminoglycan                                               |
| G'               | Shear storage Modulus,                                          |
| G''              | Loss Modulus                                                    |
| H <sub>A</sub>   | Aggregate Modulus                                               |
| K                | Initial Permeability                                            |
| LE               | Linear Elastic (constitutive model)                             |
| LEI              | Linear Elastic Isotropic (constitutive model)                   |
| M                | Permeability strain-dependency coefficient                      |

|                 |                                                                      |
|-----------------|----------------------------------------------------------------------|
| mm              | millimetre                                                           |
| MRI             | Magnetic Resonance Imaging                                           |
| μm              | micrometre                                                           |
| Na <sup>+</sup> | Sodium cation                                                        |
| NI              | Nanoindentation                                                      |
| OA              | Osteoarthritis                                                       |
| OARSI           | Osteoarthritis Research Society International                        |
| OC              | Osteochondral                                                        |
| OP              | Osteoporosis                                                         |
| P               | Plastic (constitutive model)                                         |
| pBV/TV          | Plate Bone Volume Fraction                                           |
| PG              | Proteoglycan                                                         |
| pQCT            | Peripheral Quantitative Computed Tomography                          |
| PRISMA          | Preferred Reporting Items for Systematic Reviews and Meta-Analyses   |
| pTb.S           | Average Plate Trabecular Surface                                     |
| pTb.Th          | Average Plate Trabecular Thickness                                   |
| qCT             | Quantitative Computed Tomography                                     |
| rBV/TV          | Rod Bone Volume Fraction                                             |
| SB              | Subchondral Bone                                                     |
| SMI             | Structural Model Index                                               |
| TB              | Trabecular Bone                                                      |
| tBMD            | Volumetric Bone Mineral Density contributed by transverse trabeculae |
| Tb.N            | Trabecular Number                                                    |
| Tb.Sp           | Trabecular Separation                                                |
| Tb.Th           | Trabecular Thickness                                                 |
| T2D             | Typer-2 Diabetes                                                     |
| US              | Ultrasonography                                                      |
| VE              | Visco Elastic (constitutive model)                                   |
| η               | Viscosity coefficient                                                |
